# Supplementary material for: Self-targeted smart polyester nanoparticles for simultaneous Delivery of photothermal and chemotherapeutic agents for efficient treatment of HCC
Source: Royal Society of Chemistry journal article supplement (doi:10.1039/d4bm01120a), 2024-01-01
Supplement: d4bm01120a1.pdf [file d4bm01120a1.pdf]

## Supporting Information

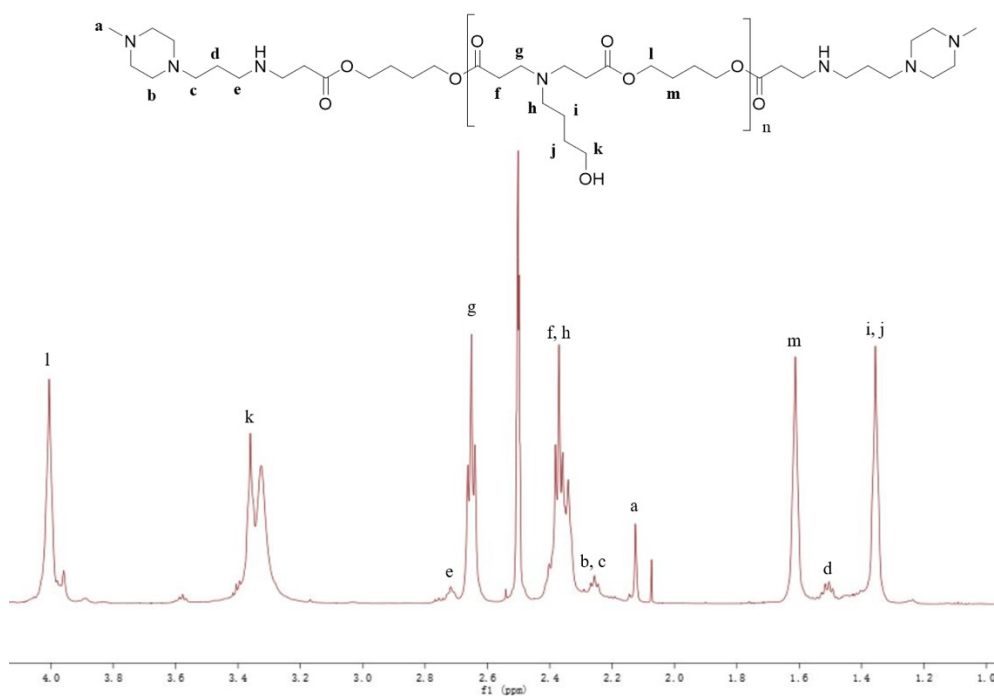

**Fig. S1.**  $^1\text{H}$  NMR spectroscopy of P $\beta$ AE-447

1.47-1.29 (m,  $\text{NCH}_2\text{CH}_2\text{CH}_2\text{CH}_2\text{OH}$  and  $\text{NCH}_2\text{CH}_2\text{CH}_2\text{CH}_2\text{OH}$ )

1.55-1.47 (t,  $\text{NCH}_2\text{CH}_2\text{CH}_2\text{N} <(\text{CH}_2\text{CH}_2)_2 > \text{NCH}_3$ )

1.67-1.55 (m,  $\text{COOCH}_2\text{CH}_2\text{CH}_2\text{CH}_2\text{OOC}$ )

2.13(s,  $\text{NCH}_2\text{CH}_2\text{CH}_2\text{N} <(\text{CH}_2\text{CH}_2)_2 > \text{NCH}_3$ )

2.43-2.21 (t,  $\text{COOCH}_2\text{CH}_2\text{NCH}_2\text{CH}_2\text{OOC}$  and t,  $\text{NCH}_2\text{CH}_2\text{CH}_2\text{CH}_2\text{OH}$  and m,

$\text{NCH}_2\text{CH}_2\text{CH}_2\text{N} <(\text{CH}_2\text{CH}_2)_2 > \text{NCH}_3$ )

2.69-2.58 (t,  $\text{COOCH}_2\text{CH}_2\text{NCH}_2\text{CH}_2\text{OOC}$ )

3.42-3.34 (m,  $\text{NCH}_2\text{CH}_2\text{CH}_2\text{CH}_2\text{OH}$ )

4.05-3.97 (m,  $\text{COOCH}_2\text{CH}_2\text{CH}_2\text{CH}_2\text{OOC}$ )

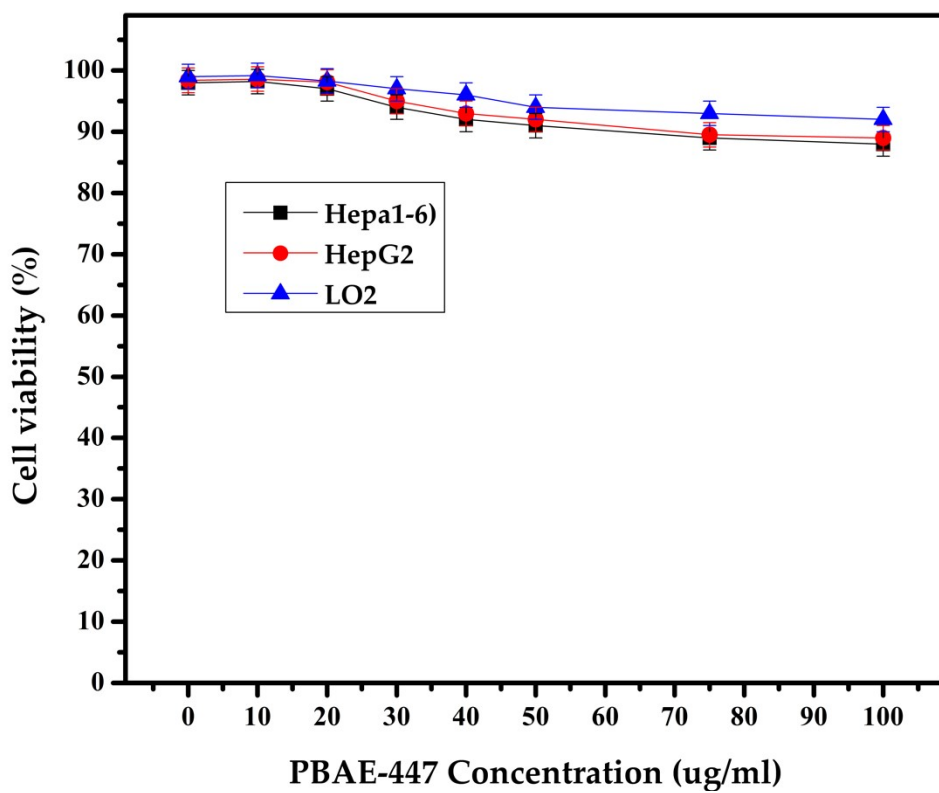

**Fig. S2.** Viability analysis of Hepa 1-6, HepG2 and LO2 cells after incubation with blank PBAE-447 at varying concentrations

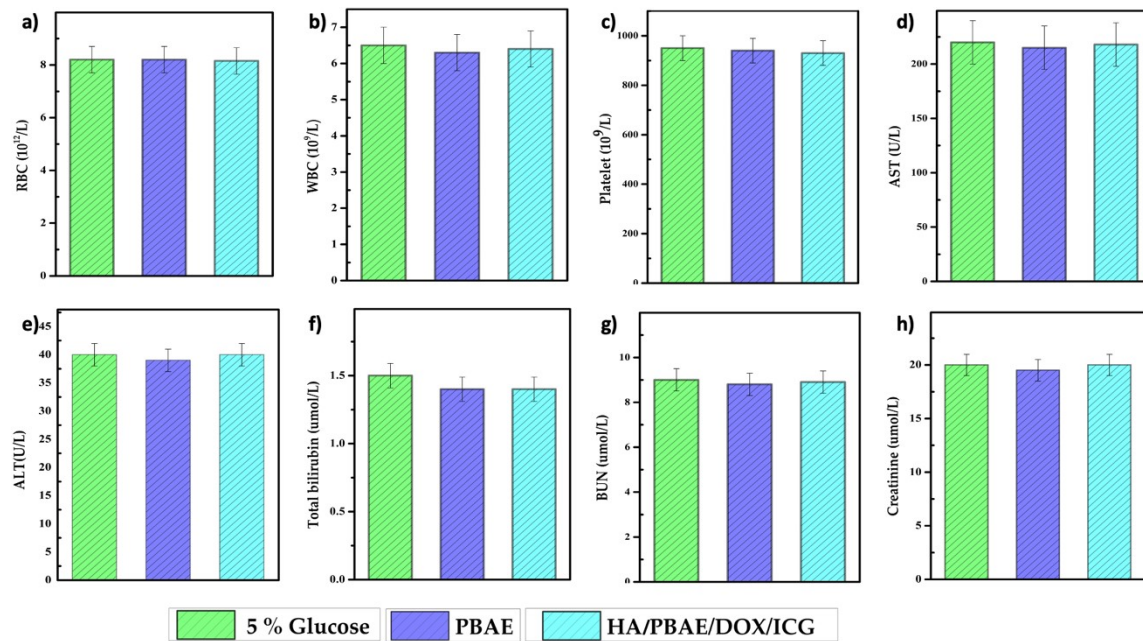

**Fig. S3** (A) RBC, (B) WBC, (C) platelet counts, (D) AST, (E) ALT, (F) total bilirubin, (G) BUN and (H) creatinine levels after intravenous treatment in C57BL/6 (n=3).
